# Supplementary material for: Cupreine grafted onto silica as an enantioselective and recyclable catalyst for the 1,4-addition of malonate to trans-β-nitrostyrene
Source: Royal Society of Chemistry journal article supplement (doi:10.1039/c5ra02292d), 2015-01-01

## Electronic Supplementary Information

### *Cupreine grafted onto silica as enantioselective and recyclable catalyst for the 1,4-addition of malonate to trans- $\beta$ -nitrostyrene.*

I. Billault, R. Launez and M.-C. Scherrmann

#### General information

All reagents were used without further purification. Quinine (99%), 2-methyltetrahydrofuran (2-MeTHF, 99%), and *trans*- $\beta$ -nitrostyrene (98%) were purchased from Alfa Aesar. Sodium ethanethiolate (NaSEt, 90%) and *N,N*-dimethyltrimethylamine (TMS-DMA, 97%) were purchased from Sigma-Aldrich. The 2,2'-Azobis(2-methyl-propionitrile) (AIBN, 98%) and dry *N,N*-dimethylformamide (DMF, 99.8%) were purchased from Acros. Dimethyl malonate (97%) was purchased from Janssen Chemica and (3-mercaptopropyl)-triethoxysilane (MPTES, 95%) was purchased from TCI Europe N.V.. The Silica 60 Å C.C. Chromagel SDS (70-200  $\mu$ m) was purchased from Carlo-Erba and was dried under vacuum at 110°C for 24 h before use.  $^1\text{H}$  and  $^{13}\text{C}$ -NMR spectra were recorded on Bruker spectrometers (250, 360 or 400 MHz). Chemical shifts ( $\delta$ ) in ppm, are given relative to tetramethylsilane (TMS) for  $^1\text{H}$  NMR and relative to  $\text{CD}_3\text{OD}$  and  $\text{CDCl}_3$  resonances at 49.00 and 77.00 ppm respectively for  $^{13}\text{C}$  NMR. Signals were assigned on the basis of  $^1\text{H}$ - $^1\text{H}$  COSY and HSQC experiments. Melting point were determined on a Büchi M560 apparatus. Optical rotations were measured on Jasco P1010 Polarimeter at the specified temperature and concentration (g/100 mL). HR-MS spectra were recorded in positive or negative mode with a microtof-QII spectrometer (Bruker) using electrospray ionization. Elemental analyses were performed at CNRS, "Institut des sciences analytiques", Villeurbanne, France. FTIR spectra were recorded on FTIR spectrometer "Spectrum One" from Perkin Elmer with a resolution of 4  $\text{cm}^{-1}$  and 100 scans. Si-CPN samples (15-20 mg) were mixed with dry KBr (~100 mg) then pressed in pellet form. TGA measurements were carried out under air on a SDT Q600 from Thermal Advantage. Si-CPN samples (15 mg) were placed in alumina crucible in the sample compartment then heated from 25 to 800°C at 5°C/min.

The adsorption-desorption isotherms were recorded at 77 K using a BelSorpII mini from BelJapan Inc. Average pore diameter have been evaluated from nitrogen desorption branch according to the Barret-Joyner-Halenda (BJH) plot. High performance liquid chromatography (HPLC) analysis was performed on an Agilent 1260 infinity chromatograph equipped with diode array detector and using a Kromasil 3-CelluCoat RP column (150 x 4.6 mm). Chromatograms were recorded and integrated at 215 nm.

#### Preparation of cupreine (CPN)<sup>1</sup>:

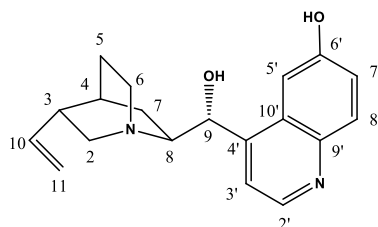

<sup>1</sup> H. Li, Y. Wang, L. Tang, and L. Deng, *J. Am. Chem. Soc.*, 2004, **126**, 9906-9907.

A mixture of quinine (5 g; 15.4 mmol) and NaSEt (5.18 g; 61.6 mmol) in dry DMF (60 mL) was stirred at 110 °C under argon for 16 h. After cooling to room temperature, aq. soln of HCl (0.1 M; 50 mL) was added to adjust the pH at 1, and the aq. phase was washed with EtOAc (3 x 100 mL). The pH of aq. phase was then adjusted to 7 by adding an aq. soln of NaOH (6 M, 25 mL) then the cupreine (CPN) was extracted with EtOAc (7 x 150 mL). The combined organic phases were washed with a sat. soln of NaCl (2 x 100 mL), dried over Na<sub>2</sub>SO<sub>4</sub>, filtered and concentrated. The same treatment was repeated once again to give the CPN as a white powder (m = 4.06 g; 85%).

<sup>1</sup>H NMR (360 MHz, CD<sub>3</sub>OD): δ 8.60 (d, *J* = 4.7 Hz, 1 H), 7.91 (d, *J* = 9.0 Hz, 1 H), 7.63 (d, *J* = 4.3 Hz, 1H), 7.34 (dd, *J* = 2.9 Hz, 9.0 Hz, 1H), 7.31 (d, *J* = 2.9 Hz, 1H), 5.60-5.80 (m, 1H), 5.52 (d, *J* = 3.2 Hz, 1H), 4.98 (d, *J* = 17.3 Hz, 1H), 4.92 (d, *J* = 10.4 Hz, 1H), 3.63 (m, 1H), 3.08-3.15 (m, 2H), 2.65-2.77 (m, 2H), 2.36 (m, 1H), 1.80-1.91 (m, 3H), 1.53-1.67 (m, 1H), 1.41-1.50 (m, 1H); <sup>13</sup>C NMR (62.9 MHz, CD<sub>3</sub>OD): δ 158.0 (C6'), 149.8 (C9'), 147.6 (C2'), 144.1 (C10'), 142.7 (C10), 131.6 (C8'), 128.5 (C4'), 123.4 (C7'), 119.9 (C3'), 115.1 (C11), 105.3 (C5'), 72.3 (C9), 61.1 (C8), 57.6 (C2), 44.4 (C6), 40.9 (C3), 29.3 (C4), 28.2 (C5), 21.9 (C7); FTIR (KBr): ν (cm<sup>-1</sup>) 3625, 3220 (br), 3074, 2970, 2948, 2862, 1622, 1596, 1579, 1533, 1467, 1338, 1291, 1260, 1239, 1224, 1131; [α]<sub>D</sub><sup>25</sup> = -164.3 (c 0.93, EtOH). Lit<sup>1</sup>: [α]<sub>D</sub><sup>25</sup> = -162.8 (c 0.93, EtOH); Mp = 196 °C (Lit<sup>2</sup> mp 202°C, recryst. From alcohol); HR-MS (ESI<sup>+</sup>): *m/z* = 311.1757, calcd. for C<sub>19</sub>H<sub>24</sub>N<sub>2</sub>O<sub>2</sub><sup>+</sup> [M+H]<sup>+</sup>: 311.1754; HRMS (ESI<sup>-</sup>): *m/z* = 309.1608 calcd. for C<sub>19</sub>H<sub>22</sub>N<sub>2</sub>O<sub>2</sub><sup>-</sup> [M-H]<sup>-</sup>: 309.1609.

### General scheme for the preparation of Si-CPN

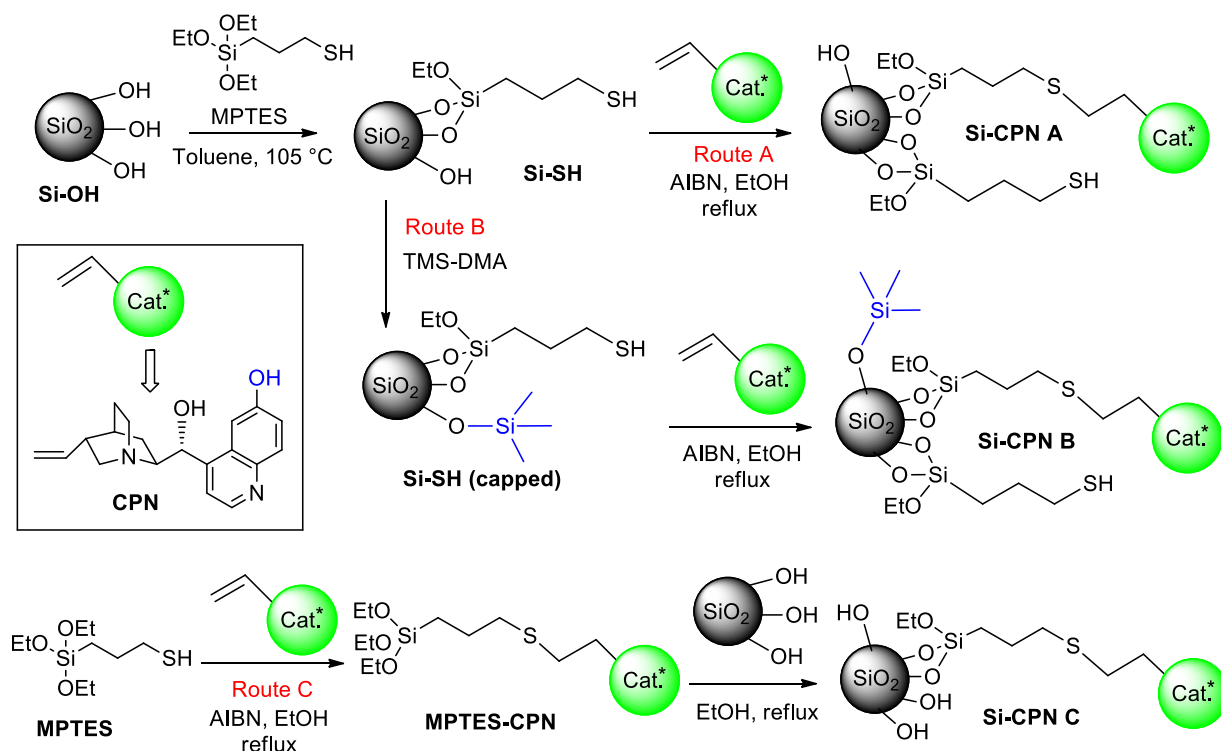

<sup>2</sup> The Merk index, 11<sup>th</sup> edition, Merc & Co., Inc, 1989.

## Commercial silica gel 60 Å

All characteristic vibration frequencies ( $\text{cm}^{-1}$ ) in FTIR spectra of commercial silica and supported catalyst Si-CPN have been assigned on the base of ref 3.

**FTIR Si 60 Å (NS = 20):**  $\nu$  ( $\text{cm}^{-1}$ ) 3418 ( $\nu$  Si-O-H, H-O-H), 1985, 1866 (overtone), 1634 ( $\delta$  H-O-H), 1385 ( $\delta_s$  CH<sub>2</sub> residual), 1221, 1114 ( $\nu_{\text{as}}$  Si-O-Si), 953 ( $\nu$  Si-OH), 800 ( $\nu$  Si-O).

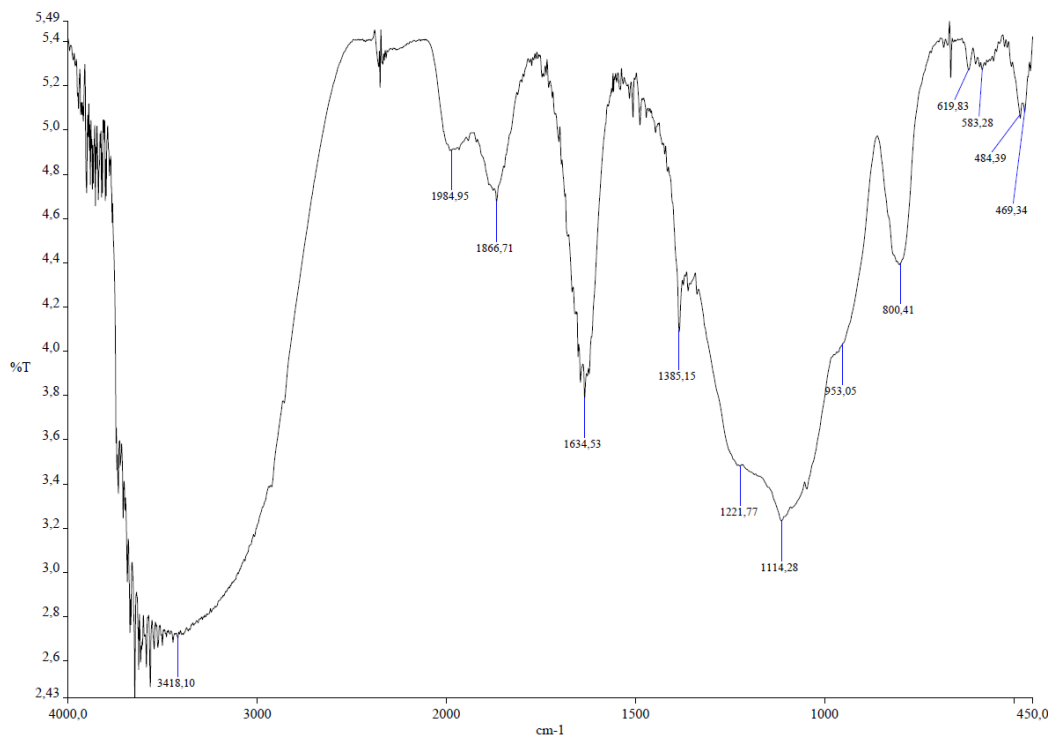

## Thermogravimetry analysis

Weight loss at 79 °C for residual H<sub>2</sub>O.

Sample: Si60 séchée air  
Size: 12.0530 mg  
Method: Ramp

DSC-TGA

File: C:\...Rémy\Si60 séchée air.001  
Operator: rémy  
Run Date: 09-Dec-2013 13:06  
Instrument: SDT Q600 V8.3 Build 101

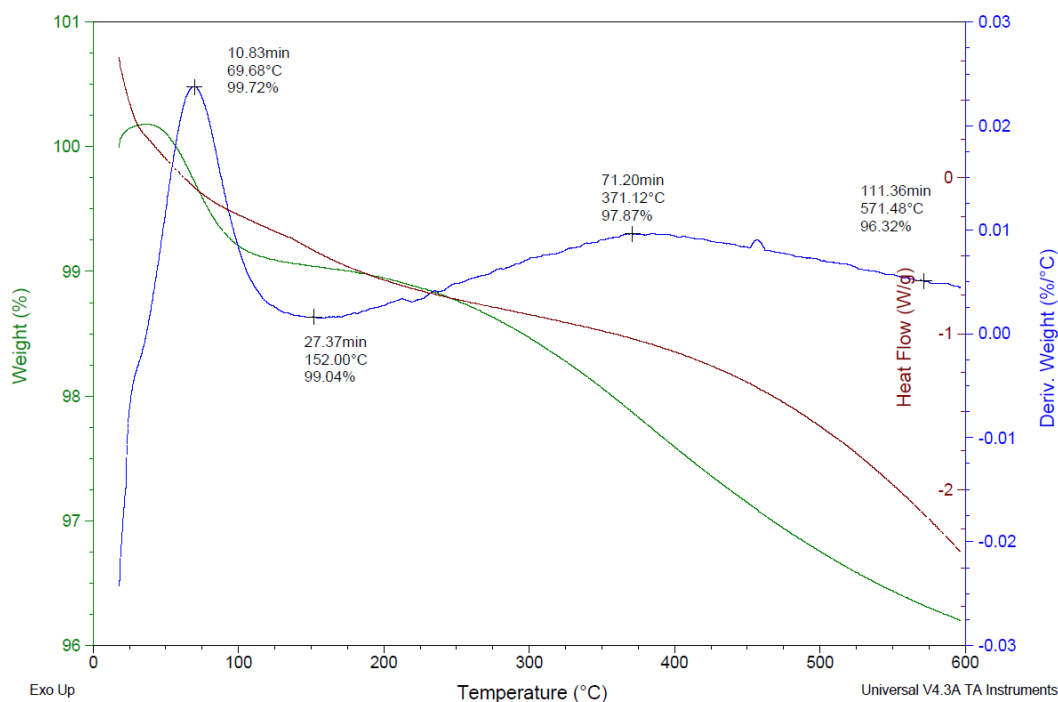

<sup>3</sup> (a) R. Al-Oweini and H. El-Rassy, *J. mol. Struct.*, 2009, **919**, 140-145. (b) J. Hong, I. Lee, F. Zaera, *Top. Catal.*, 2011, **54**, 1340-1347.

## BET Analysis: N<sub>2</sub> adsorption /desorption isotherm and BJH plot treatment

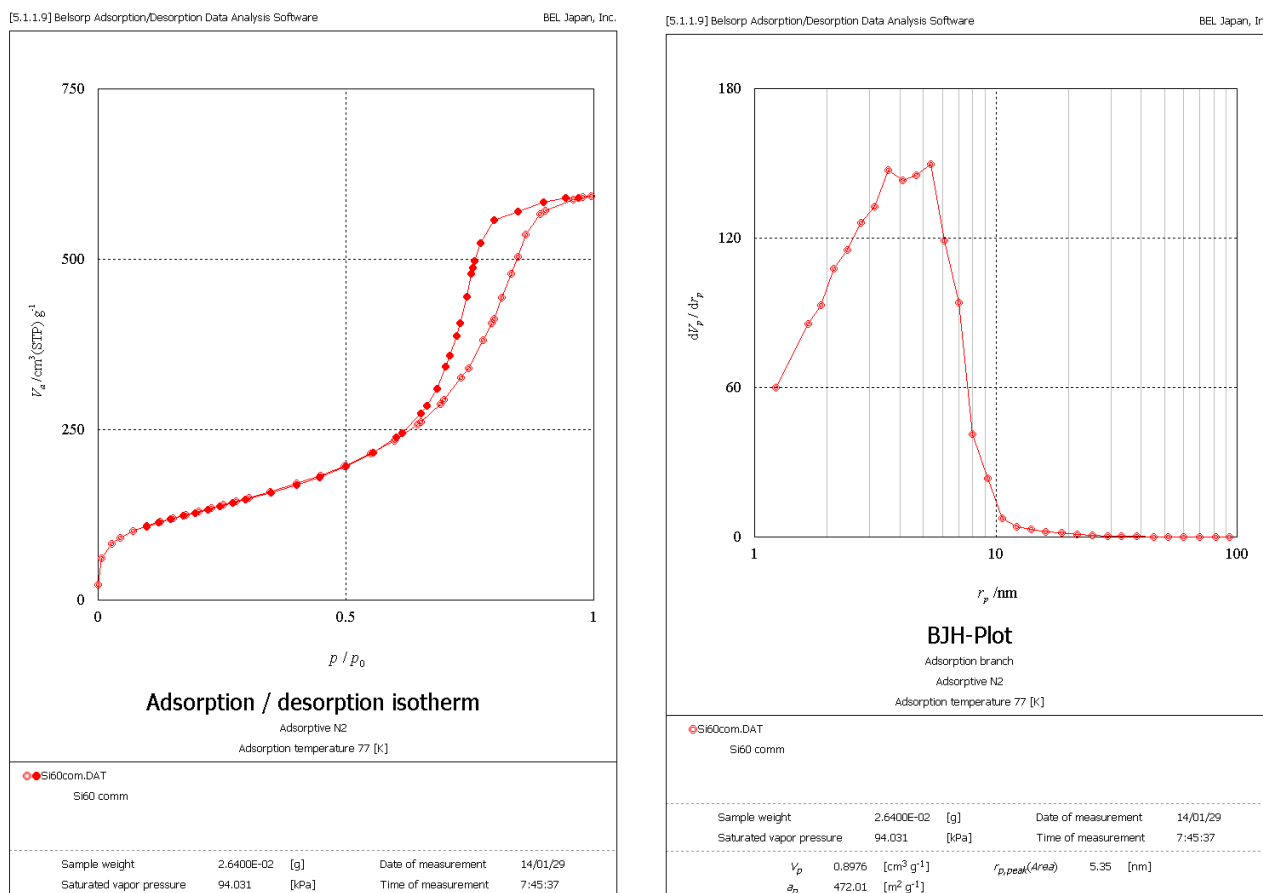

**BJH-Plot treatment:** specific area = 472 m<sup>2</sup>.g<sup>-1</sup>; pore volume = 0.90 cm<sup>3</sup>.g<sup>-1</sup>; pore diameter = 10.7 nm

## ROUTE A for the preparation of the supported catalyst Si-CPN A

### Preparation of silica Si-SH:

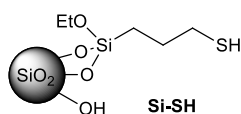

To dry silica 60 Å (10 g) were added toluene (15 mL) and MPTES (2.4 mL; 10 mmol) then the reaction mixture was heated under argon at 105°C for 48 h. After cooling to room temperature, the silica (Si-SH) was recovered through filtration, then washed with toluene (200 mL), EtOH (200 mL) and CH<sub>2</sub>Cl<sub>2</sub> (100 mL). The silica Si-SH was dried under *vacuum* at room temperature for 12 h to give white powder (12.1 g).

Elemental analysis: % C 4.55; % H 1.51; % S 2.87 (0.9 mmol of SH group.g<sup>-1</sup> of silica)

Grafting yield of MPTES: 90%

**FTIR of silica Si-SH:**  $\nu$  ( $\text{cm}^{-1}$ ) 3435 ( $\nu$  Si-O-H, H-O-H), 2978, 2935, 2896 ( $\nu$  C-H,  $\text{CH}_3$ ,  $\text{CH}_2$ ), 2577 ( $\nu$  S-H), 1974, 1868 (overtone), 1628 ( $\delta$  H-O-H), 1484, 1449, 1385, 1346 ( $\delta_{\text{as}}$ ,  $\delta_{\text{s}}$ ,  $\text{CH}_3$ ,  $\text{CH}_2$ ), 1206, 1090 ( $\nu_{\text{as}}$  Si-O-Si), 961 ( $\nu$  Si-OH), 802 ( $\nu$  Si-O).

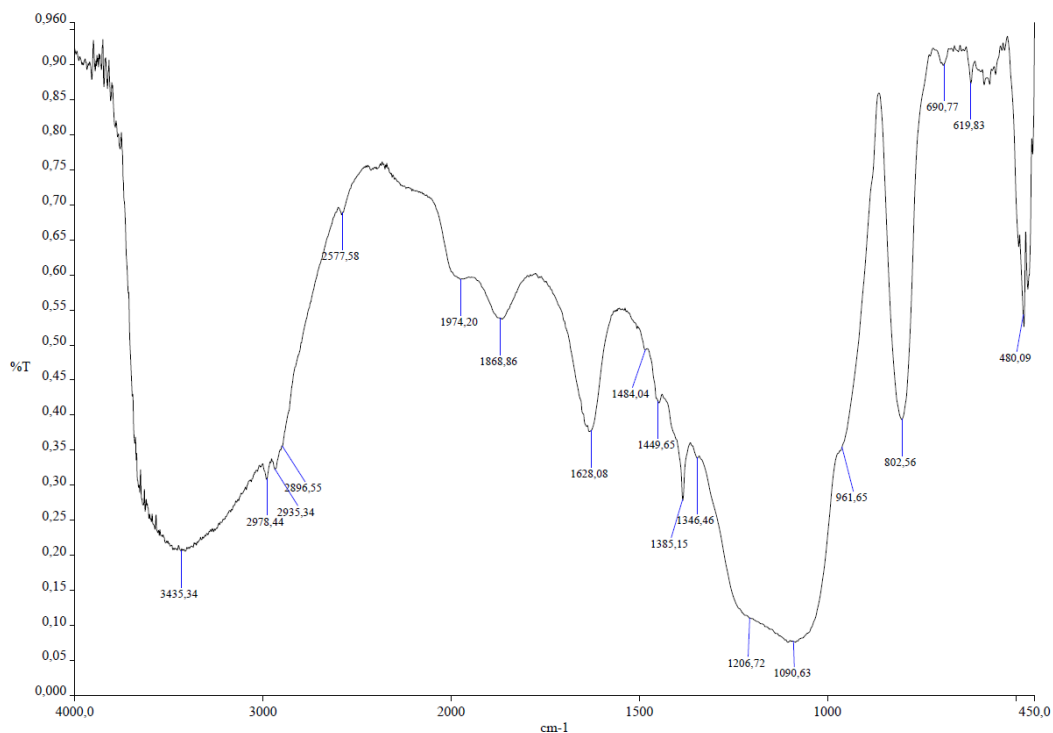

## Thermogravimetry analysis of Si-SH

Weight loss at 42 °C for residual solvent. The linker with SH group induced a weight loss at 332°C.

Sample: RL175 air  
Size: 19.5530 mg  
Method: Ramp

DSC-TGA

File: C:\TA\Data\Chercheurs\R  my\RL175 air.001  
Operator: r  my  
Run Date: 06-Jan-2014 09:14  
Instrument: SDT Q600 V8.3 Build 101

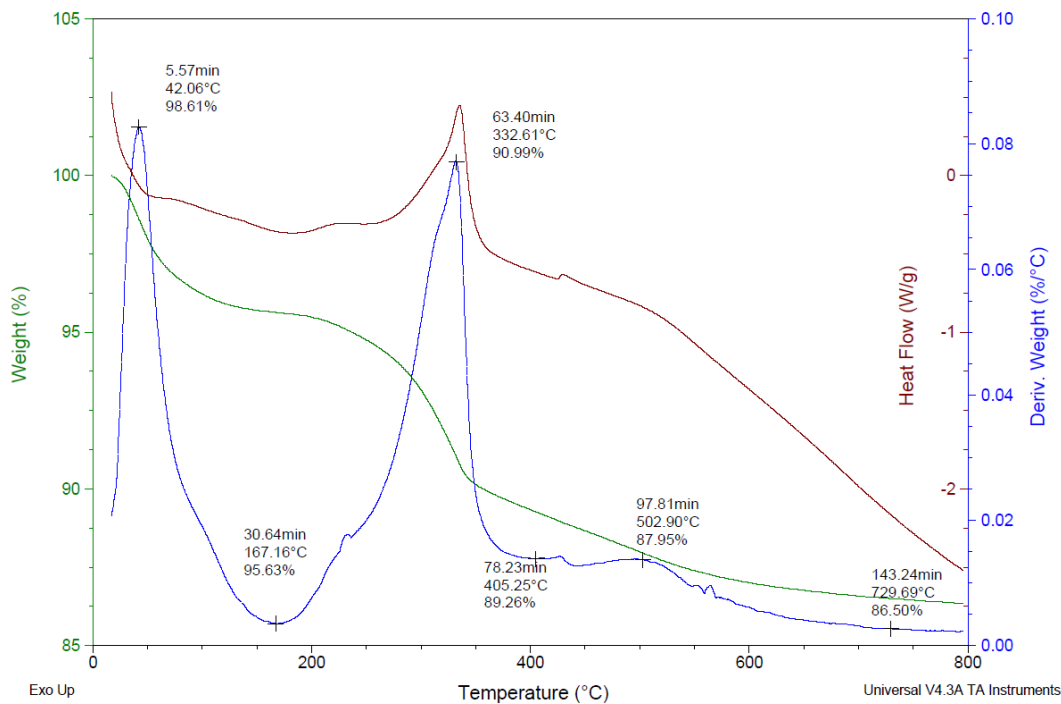

## BET analysis: N<sub>2</sub> adsorption /desorption isotherm and BJH plot treatment

[5.1.1.9] Belsorp Adsorption/Desorption Data Analysis Software

BEL Japan, Inc.

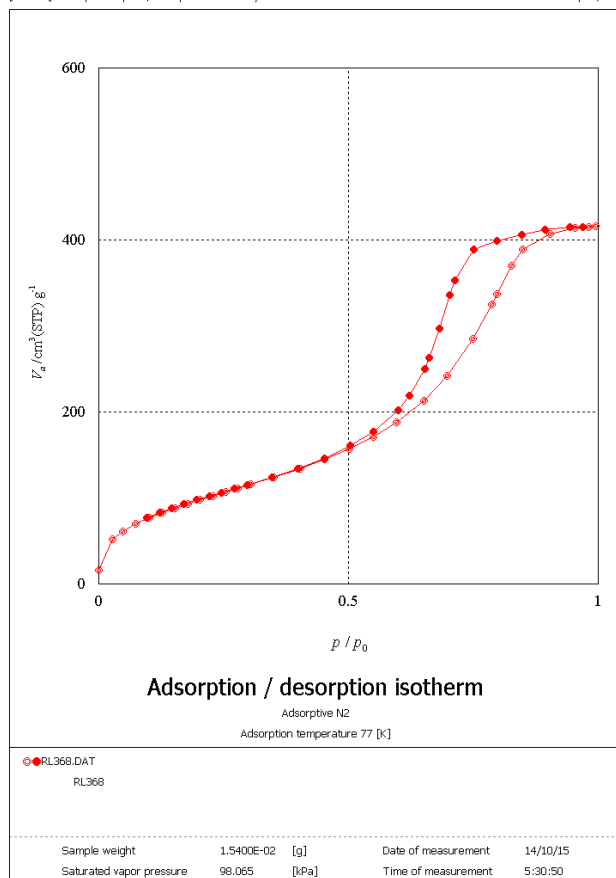

[5.1.1.9] Belsorp Adsorption/Desorption Data Analysis Software

BEL Japan, Inc.

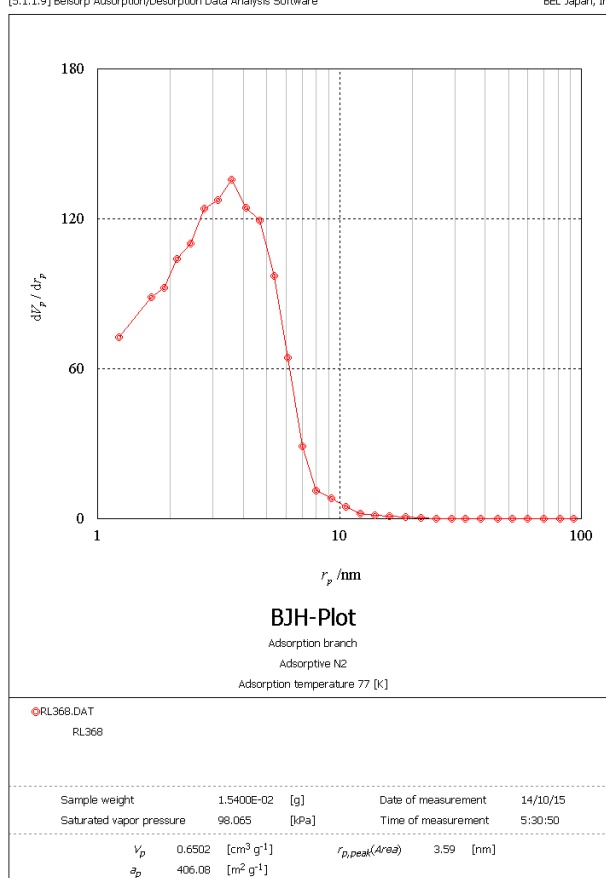

**BJH-Plot treatment:** specific area = 406 m<sup>2</sup>.g<sup>-1</sup>; pore volume = 0.65 cm<sup>3</sup>.g<sup>-1</sup>; pore diameter = 7.2 nm

## Preparation of supported catalyst Si-CPN A from silica Si-SH:

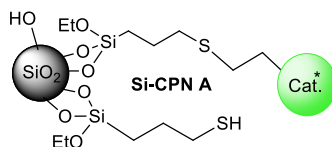

To a solution of CPN (1.55 g; 5 mmol) in dry EtOH (25 mL) under argon were added silica Si-SH (5 g; 0.9 mmol of SH/g of silica) and AIBN (0.250 g; 1.52 mmol). The mixture was heated at 90°C for 24 h. After cooling at room temperature, the silica Si-CPN A was recovered by filtration, then washed with EtOH (150 mL) and CH<sub>2</sub>Cl<sub>2</sub> (75 mL). The silica Si-CPN A was washed by solid-liquid extraction in a Soxhlet apparatus with dry EtOH (150 mL) for 6 hours under argon, then washed with CH<sub>2</sub>Cl<sub>2</sub> (100 mL) and dried under *vacuum* for 12 h to give yellowish powder (5.49 g).

**Elemental analysis:** % C 11.3; % S 2.68; % N 1.02

Catalyst loading: 0.364 mmol of CPN.g<sup>-1</sup> of silica

Residual SH groups: 60%

**FTIR of Si-CPN A:**  $\nu$  ( $\text{cm}^{-1}$ ) 3431 ( $\nu$  Si-O-H, H-O-H), 2982, 2931, 2866 ( $\nu$  C-H,  $\text{CH}_3$ ,  $\text{CH}_2$ ), 1978, 1871 (overtone), 1623 ( $\delta$  H-O-H), 1514 ( $\delta_{\text{quinoline ring}}$ ,  $\delta_{\text{CH quinoline}}$ ), 1469, 1385, 1342 ( $\delta_{\text{as}}$ ,  $\delta_{\text{s}}$ ,  $\text{CH}_3$ ,  $\text{CH}_2$ ), 1208, 1084 ( $\nu_{\text{as}}$  Si-O-Si), 950 ( $\nu$  Si-OH), 800 ( $\nu$  Si-O).

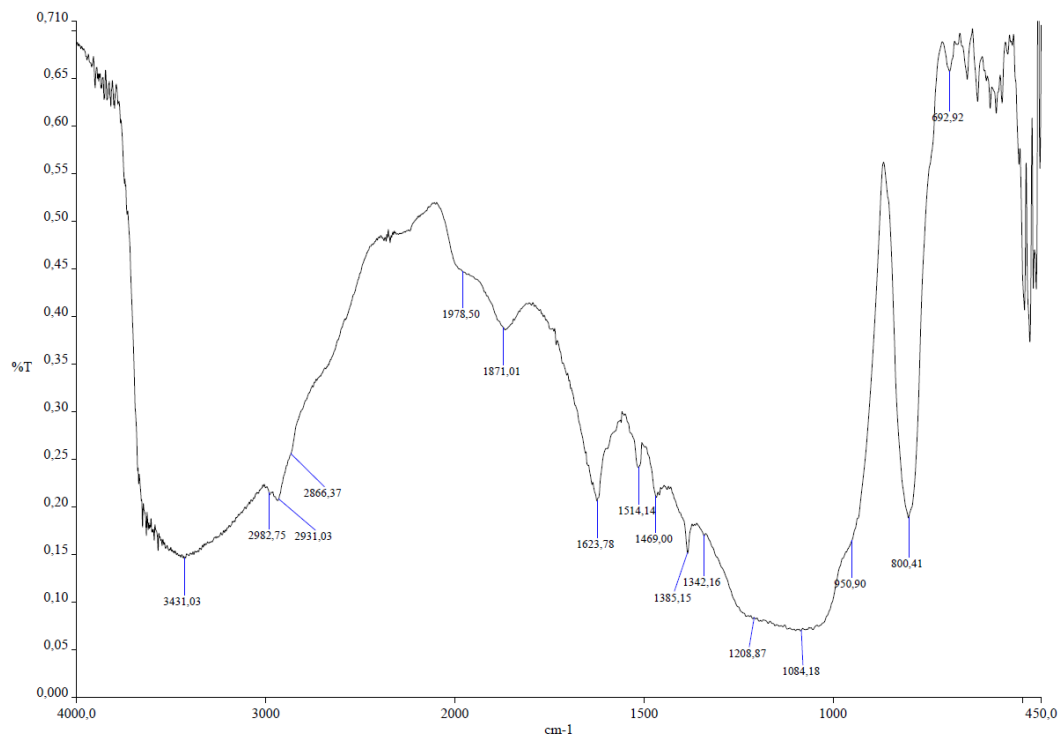

### Thermogravimetry analysis

Weight loss at 37 °C for residual solvent. The residual linker with SH group and grafted catalyst Si-CPN induced a weight loss at 298°C and 518 °C, respectively.

Sample: RL300  
Size: 12.1580 mg  
Method: Ramp

DSC-TGA

File: C:\TA\Data\Chercheurs\R  my\RL300.001  
Operator: R  my  
Run Date: 28-May-2014 10:41  
Instrument: SDT Q600 V8.3 Build 101

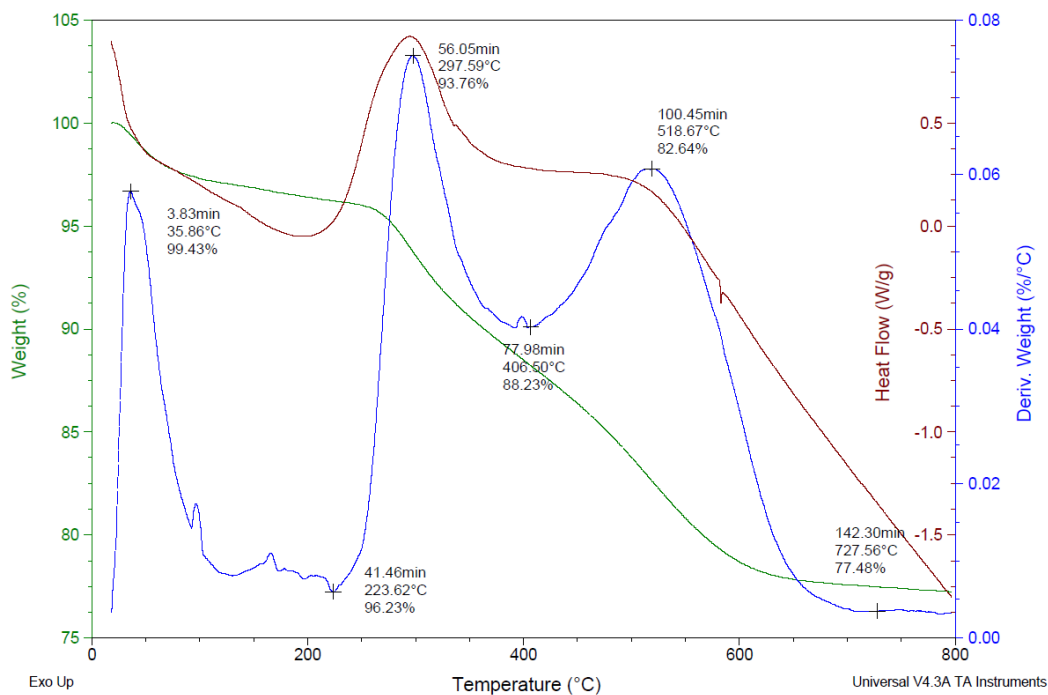

## BET Analysis: N<sub>2</sub> adsorption /desorption isotherm and BJH plot treatment

[5.1.1.9] Belsorp Adsorption/Desorption Data Analysis Software

BEL Japan, Inc.

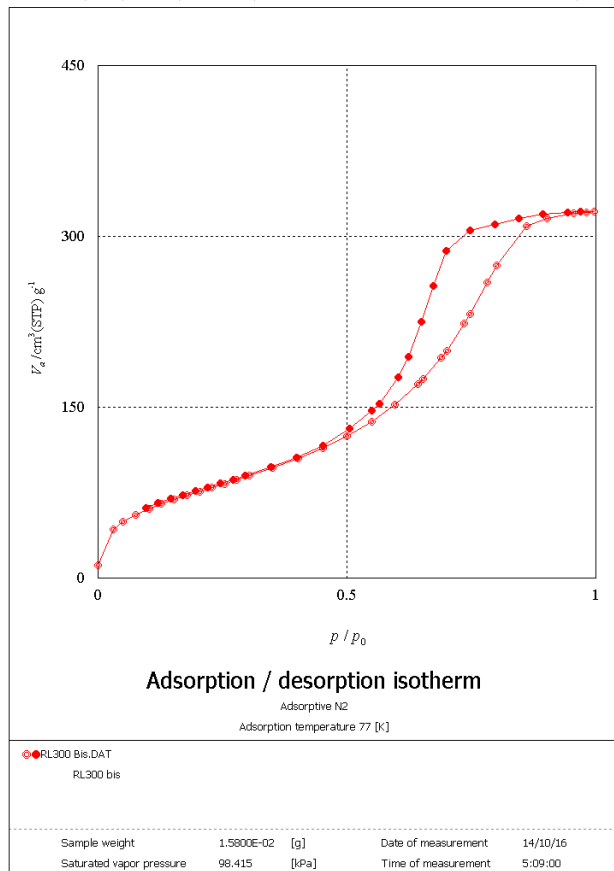

[5.1.1.9] Belsorp Adsorption/Desorption Data Analysis Software

BEL Japan, Inc.

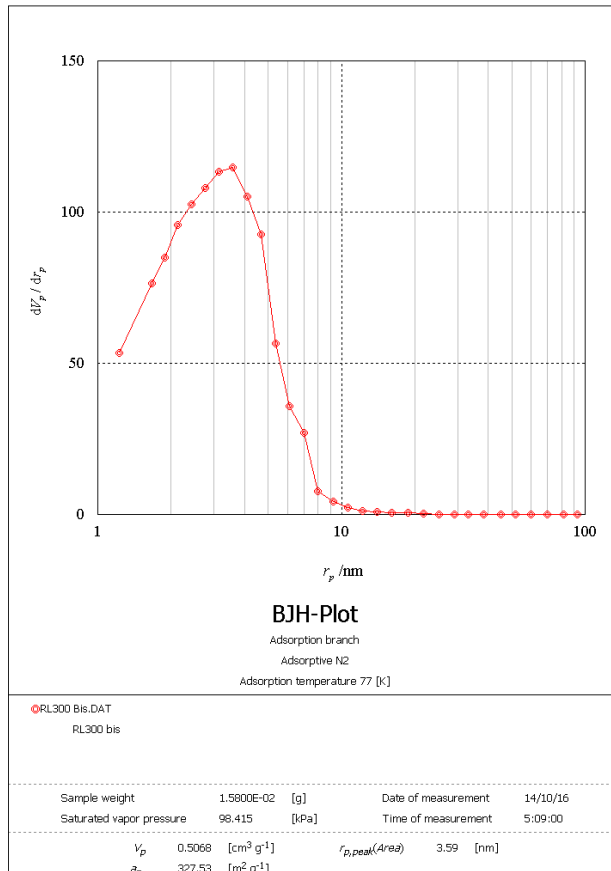

**BJH-Plot treatment:** specific area = 327 m².g<sup>-1</sup>; pore volume = 0.5 cm³.g<sup>-1</sup>; pore diameter = 7.2 nm

## ROUTE B for the preparation of supported catalyst Si-CPN B

### Preparation of TMS capped silica Si-SH from silica Si-SH:

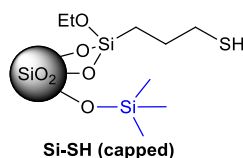

To the silica Si-SH (4 g; 0.9 mmol of SH group.g<sup>-1</sup> of silica; % C 4.55) in dry toluene (25 mL) was added TMS-DMA (2.64 g; 22.5 mmol). The mixture was heated to 105°C for 24 h under argon. The reaction mixture was cooled down to room temperature and the TMS capped silica Si-SH was recovered by filtration, washed with toluene (2 x 75 mL) and CH<sub>2</sub>Cl<sub>2</sub> (2 x 75 mL) then dried under *vacuum* for 12 h to give 4.2 g of a white powder.

**Elemental analysis:** % C 6.6; % S 2.76 => 0.862 mmol of SH.g<sup>-1</sup> of silica and 0.55 mmol Si(Me)<sub>3</sub> group.g<sup>-1</sup> of silica calculated from the initial % C of silica Si-SH (4.55 C%).



**FTIR of Si-SH (TMS capped):**  $\nu$  ( $\text{cm}^{-1}$ ) 3448 ( $\nu$  Si-O-H, H-O-H), 2961, 2905 ( $\nu$  C-H,  $\text{CH}_3$ ,  $\text{CH}_2$ ), 2581 ( $\nu$  S-H), 1965, 1868 (overtone), 1625 ( $\delta$  H-O-H), 1469, 1445, 1385 ( $\delta_{\text{as}}$ ,  $\delta_{\text{s}}$ ,  $\text{CH}_3$ ,  $\text{CH}_2$ ), 1221, 1086 ( $\nu_{\text{as}}$  Si-O-Si), 957 ( $\nu$  Si-OH), 847 ( $\nu$  Si-C), 804 ( $\nu$  Si-O).

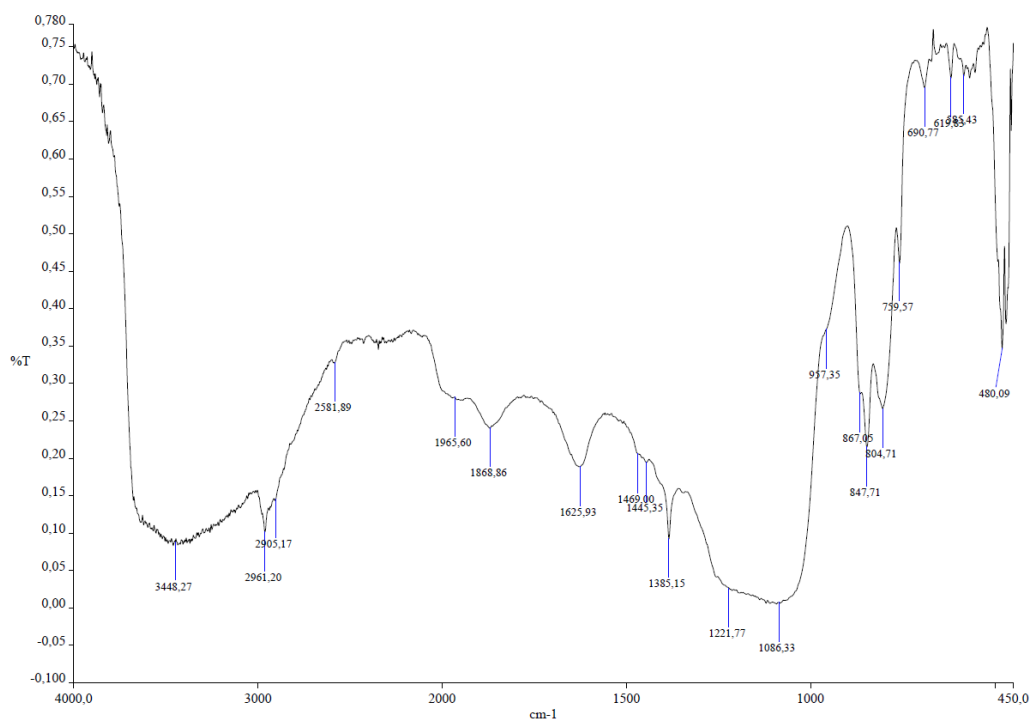

#### Preparation of supported catalyst Si-CPN B from TMS capped silica Si-SH:

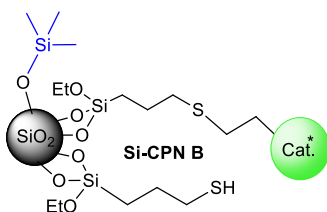

To the TMS capped silica Si-SH (3 g; 0.86 mmol of  $\text{SH.g}^{-1}$  of silica) in dry EtOH (20 mL) were added CPN (310 mg; 1 mmol) and AIBN (0.120 g; 0.73 mmol) under argon. The reaction mixture was heated to 90 °C for 48 h. After cooling to room temperature, the silica Si-CPN B was recovered by filtration, washed with EtOH (150 mL),  $\text{CH}_2\text{Cl}_2$  (75 mL). The silica Si-CPN B was washed by solid-liquid extraction in a Soxhlet apparatus with dry EtOH (150 mL) for 6 hours under argon, then washed with  $\text{CH}_2\text{Cl}_2$  (100 mL) and dried under *vacuum* for 12 h to give yellowish powder (3.21 g).

**Elemental analysis:** % C 9.63; % S 2.75; % N 0.75

Catalyst loading: 0.268 mmol of CPN. $\text{g}^{-1}$  of silica.

Residual SH groups: 69%

**Methyl Red Test<sup>4</sup>:** Silica sample (50 mg) was added to a solution of dimethylamino-4 phenylazo-2 benzoic acid (1 mL, 1.5 mmol.L<sup>-1</sup>). Commercial silica sample (A) or silica Si-SH sample (B) turned pink by adsorption of methyl red onto acidic silica surface in the presence of free silanol while samples of silica TMS-capped silica such as Si-SH capped (C) or Si-CPN B (D) remain colorless.

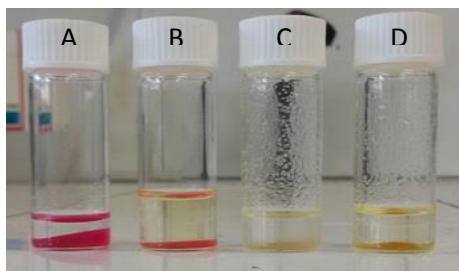

Methyl Red test :

(A) Commercial silica 60 Å; (B) silica Si-SH, (C) TMS-capped silica Si-SH and (D) Si-CPN B.

**FTIR of Si-CPN B:**  $\nu$  (cm<sup>-1</sup>) 3431 ( $\nu$  Si-O-H, H-O-H), 2965, 2931, 2870 ( $\nu$  C-H, CH<sub>3</sub>, CH<sub>2</sub>), 1972, 1868 (overtone), 1623 ( $\delta$  H-O-H), 1514 ( $\delta_{\text{quinoline ring}}$ ,  $\delta_{\text{CH quinoline}}$ ), 1466, 1385, 1348 ( $\delta_{\text{as}}$ ,  $\delta_{\text{s}}$ , CH<sub>3</sub>, CH<sub>2</sub>), 1200, 1092 ( $\nu_{\text{as}}$  Si-O-Si), 959 ( $\nu$  Si-OH), 845 ( $\nu$  Si-C), 802 ( $\nu$  Si-O).

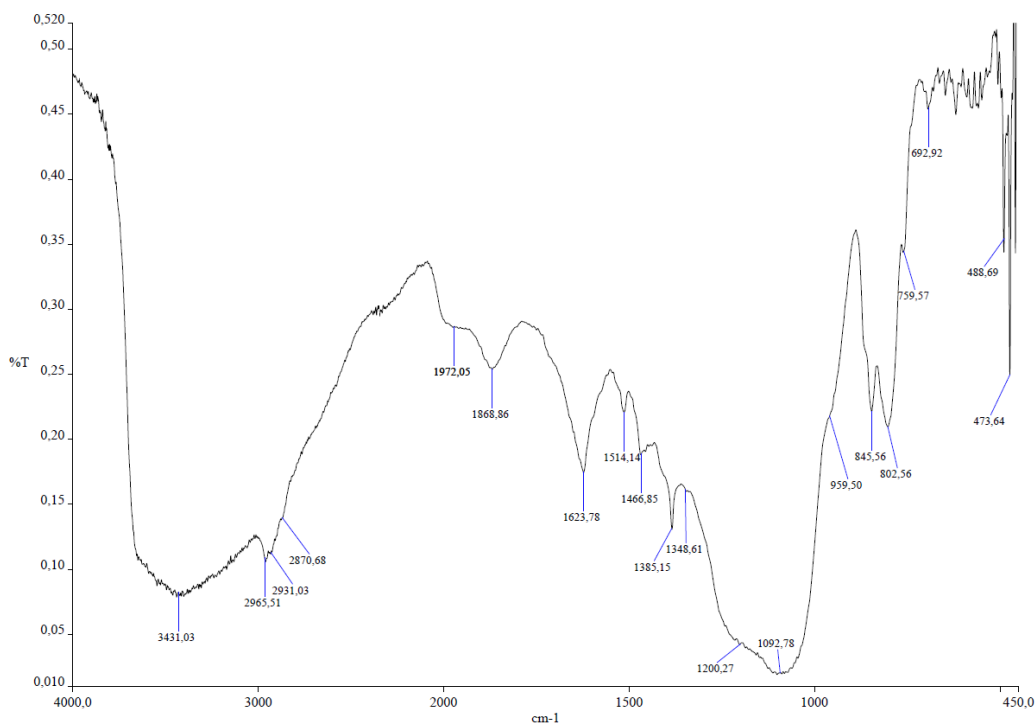

<sup>4</sup> A. Heckel and D. Seebach, *Chem. Eur. J.* 2002, **8**, 559-572

## Thermogravimetry analysis

Weight loss at 40 °C for residual solvent. The residual linker with SH group and grafted catalyst Si-CPN induced a weight loss at 301°C and 485 °C, respectively.

Sample: RL352  
Size: 11.4420 mg  
Method: Ramp

DSC-TGA

File: C:\TA\Data\Chercheurs\R  my\RL352.001  
Operator: R  my  
Run Date: 18-Jul-2014 13:29  
Instrument: SDT Q600 V8.3 Build 101

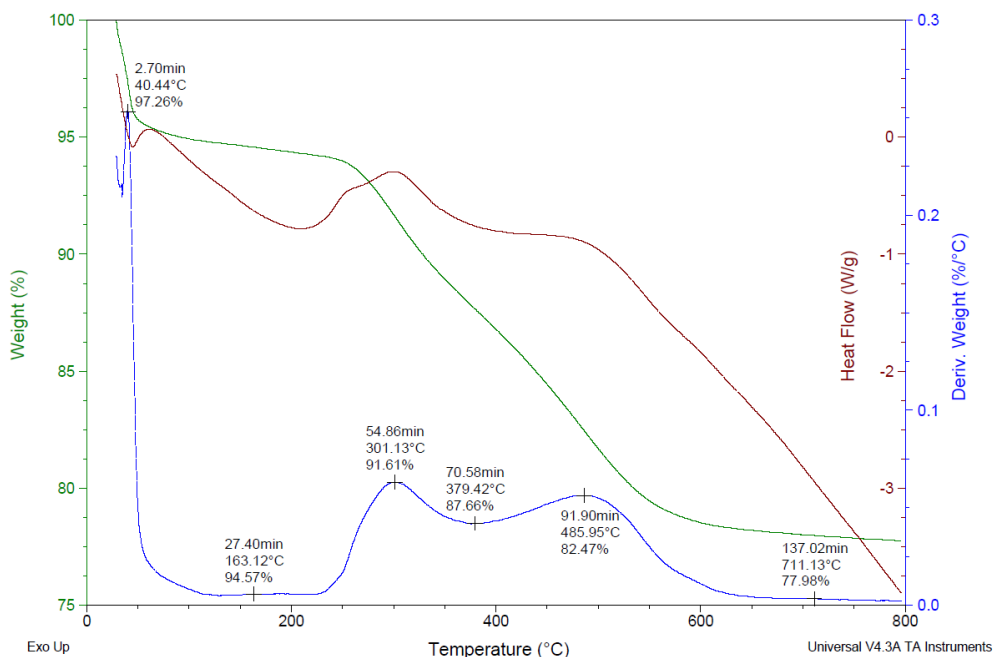

## BET Analysis: N<sub>2</sub> adsorption /desorption isotherm and BJH plot treatment

[5.1.1.9] Belsorp Adsorption/Desorption Data Analysis Software

BEL Japan, Inc.

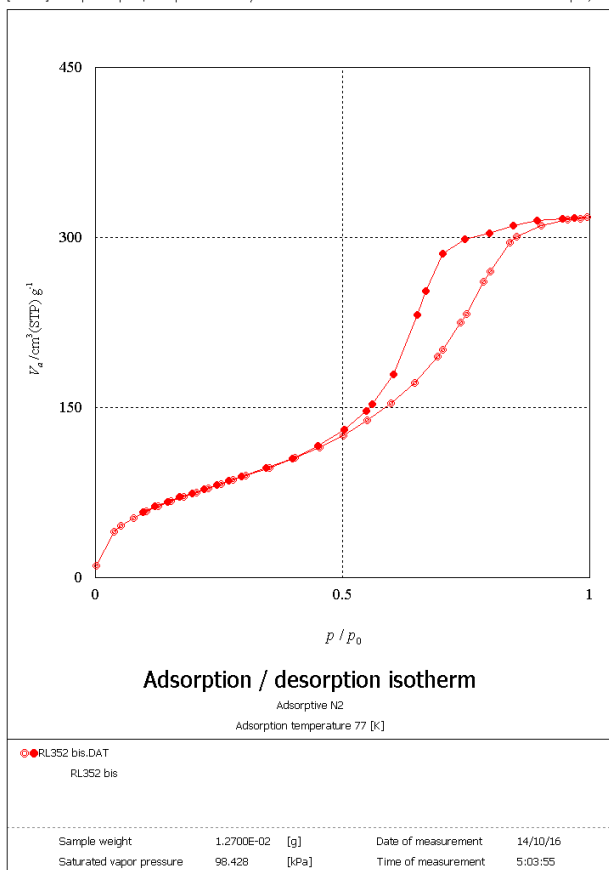

[5.1.1.9] Belsorp Adsorption/Desorption Data Analysis Software

BEL Japan, Inc.

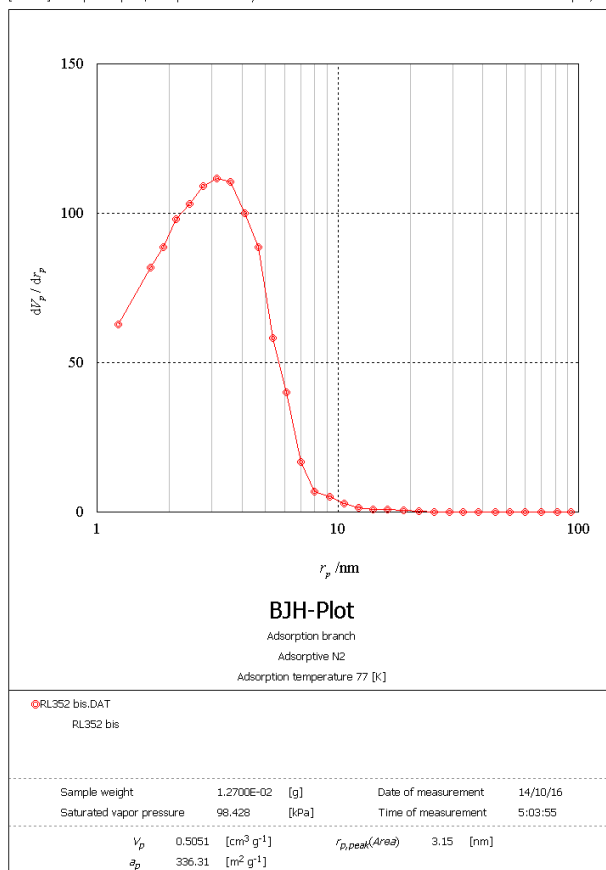

**BJH-Plot treatment:** specific area = 336 m².g⁻¹; pore volume = 0.50 cm³.g⁻¹; pore diameter = 6.3 nm

## ROUTE C for the preparation of supported catalyst Si-CPN C

To a solution of CPN (500 mg, 1.61 mmol) in dry EtOH (5 mL) under argon were added MPTES (582  $\mu$ L; 2.42 mmol) and AIBN (53mg; 0.32 mmol). After 8 h at 90 °C, CPN was completely consumed ( $^1\text{H-NMR}$  analysis) to give the adduct MPTES-CPN.

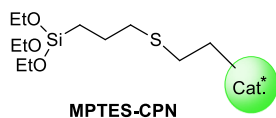

$^1\text{H-NMR}$  ( $\text{CDCl}_3$ ; 360 MHz)

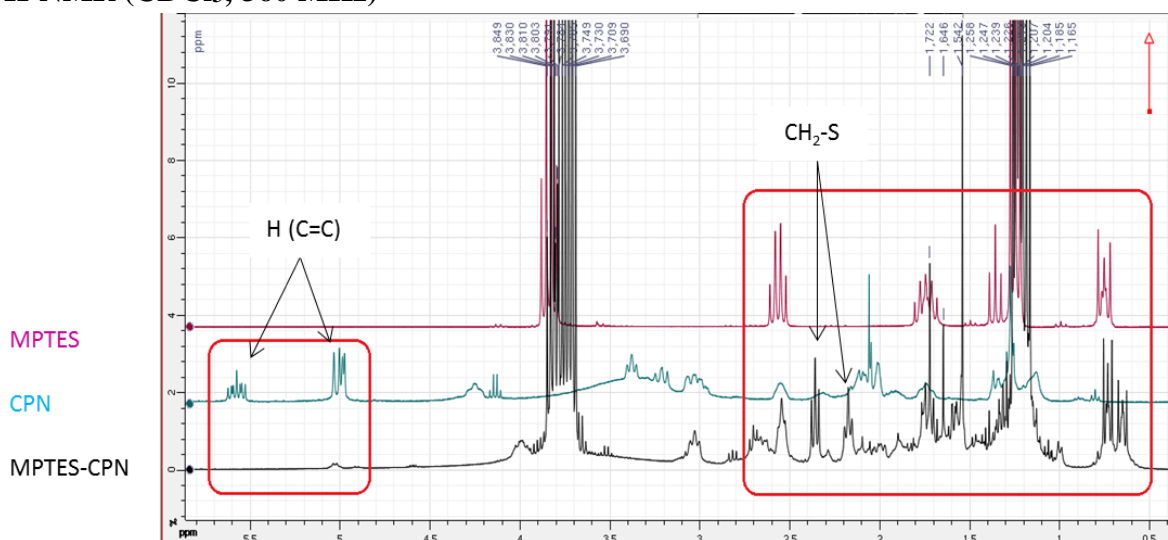

MPTES-CPN: HR-MS ( $\text{ESI}^+$ ):  $m/z = 549.2803$ , calcd. for  $\text{C}_{28}\text{H}_{46}\text{N}_2\text{O}_5\text{SSi}^+$  [ $\text{M}+\text{H}^+$ ]: 549.2813.

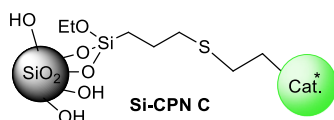

The reaction mixture was cooled down to room temperature then dry commercial silica Si 60 Å (5 g) and EtOH (10 mL) were added. After removing of EtOH under vacuum, the silica sample was washed with  $\text{CH}_2\text{Cl}_2$  (2 x 150 mL) to eliminate the excess MPTES. Dry EtOH (25 mL) was added to the silica and the mixture was heated at 90 °C for 24 h under argon. After cooling at room temperature, the Si-CPN C was recovered through filtration and washed with EtOH (250 mL) then  $\text{CH}_2\text{Cl}_2$  (100 mL). The Si-CPN C was washed by solid-liquid extraction in a Soxhlet apparatus with dry EtOH (150 mL) for 6 h under argon, recovered, washed with  $\text{CH}_2\text{Cl}_2$  (100 mL) and dried under vacuum for 12 h to give yellowish powder (5.37) g

**Elemental analysis:** % C 7.09; % S 0.88; % N 0.63

Catalyst loading: 0.225 mmol of CPN.g $^{-1}$  of silica

Residual SH group: 18 %

**FTIR of Si-CPN C:**  $\nu$  ( $\text{cm}^{-1}$ ) 3443 ( $\nu$  Si-O-H, H-O-H), 2982, 2931, 2853 ( $\nu$  C-H,  $\text{CH}_3$ ,  $\text{CH}_2$ ), 1972, 1862 (overtone), 1625 ( $\delta$  H-O-H), 1516 ( $\delta_{\text{quinoline ring}}$ ,  $\delta_{\text{CH quinoline}}$ ), 1469, 1385 ( $\delta_{\text{as}}$ ,  $\delta_{\text{s}}$ ,  $\text{CH}_3$ ,  $\text{CH}_2$ ), 1202, 1086 ( $\nu_{\text{as}}$  Si-O-Si), 961 ( $\nu$  Si-OH), 796 ( $\nu$  Si-O).

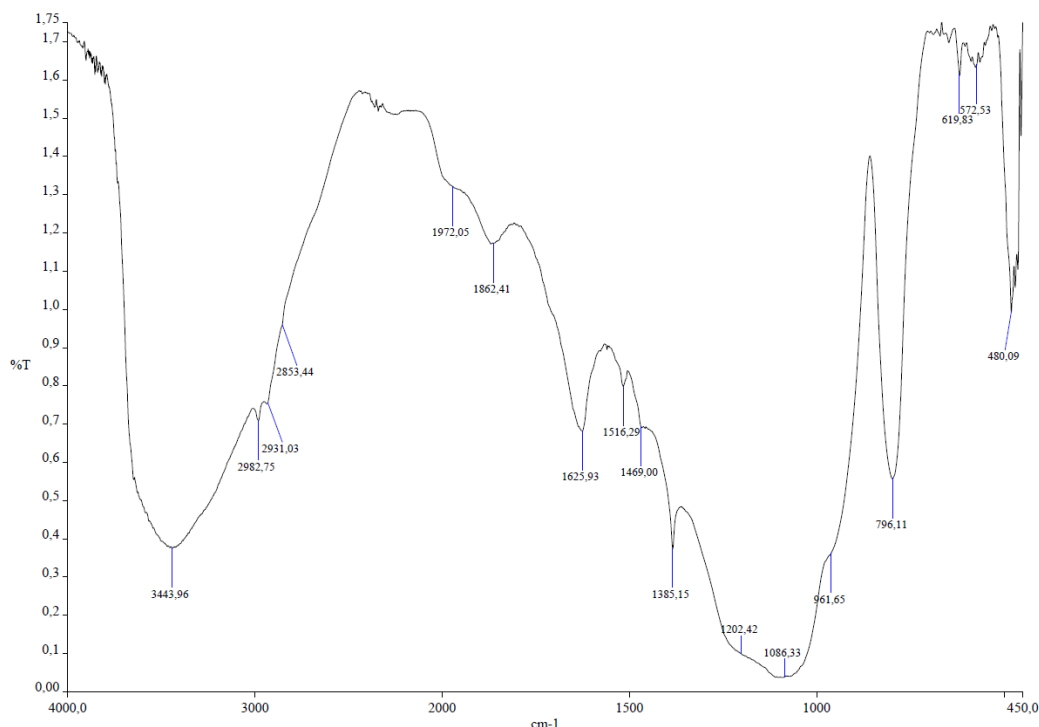

### Thermogravimetry analysis

Weight loss at 32 °C for residual solvent. The residual linker with SH group and grafted catalyst Si-CPN induced a weight loss at 291°C and 508 °C, respectively.

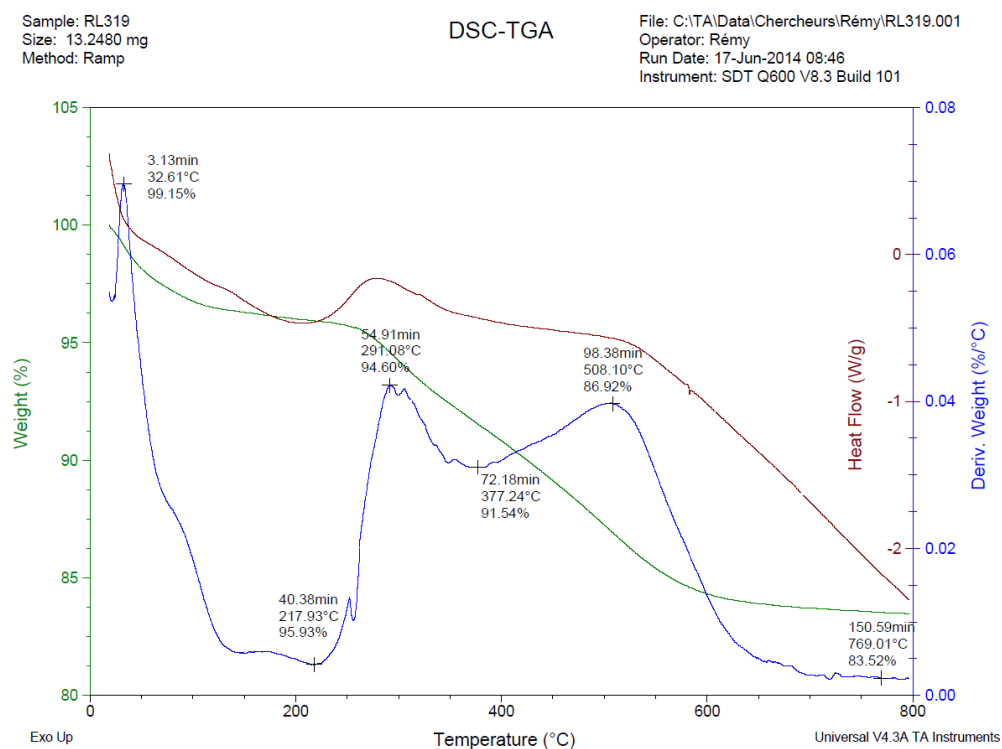

## BET Analysis: N<sub>2</sub> adsorption /desorption isotherm and BJH plot treatment

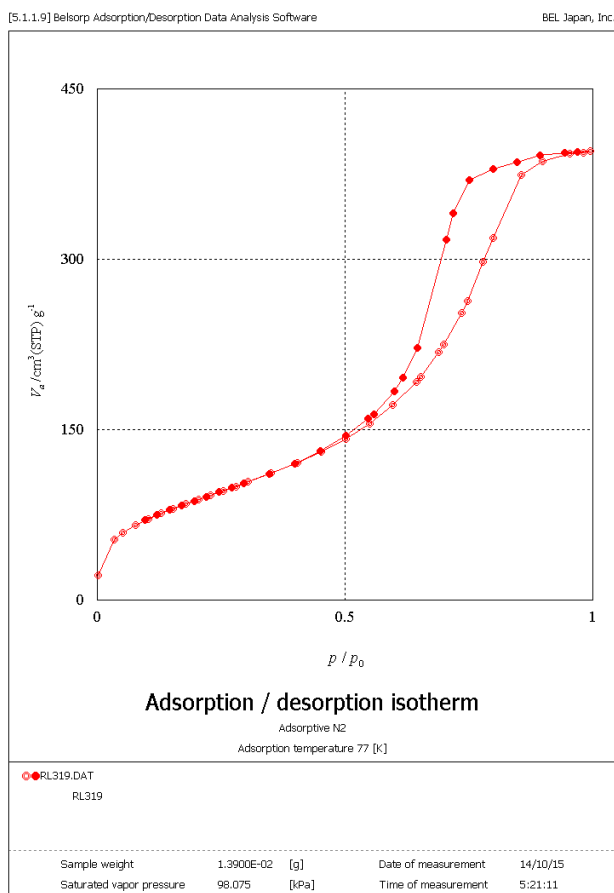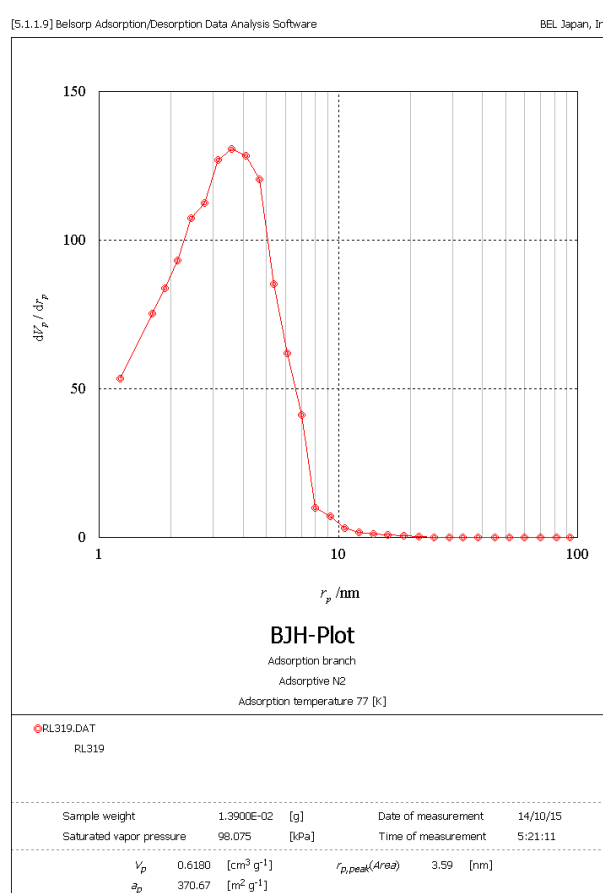

**BJH-Plot treatment:** specific area = 371 m<sup>2</sup>.g<sup>-1</sup>; pore volume = 0.62 cm<sup>3</sup>.g<sup>-1</sup>; pore diameter = 7.2 nm

### General procedure for enantioselective Michael addition of dimethyl malonate (**2**) to *trans*-β-nitrostyrene (**1**) for the preparation of (S)-(+)-methyl 2-carboxymethoxy-4-nitro-3-phenyl-butyrate (**3**).

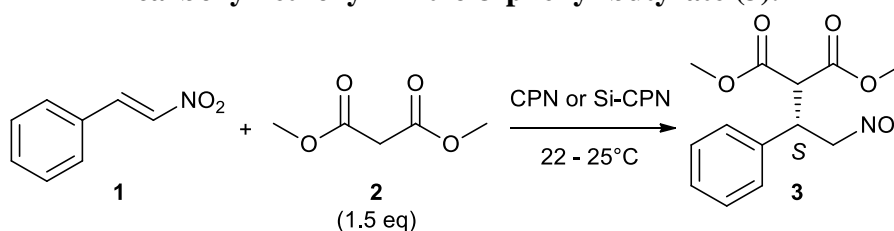

#### Homogeneous conditions

To a solution of *trans*-β-nitrostyrene **1** (37.5 mg; 0.25 mmol) in solvent (0.5 mL) were added dimethyl malonate **2** (43 μL, 0.375 mmol) and CPN (7.8 mg, 0.025 mmol). The resulting mixture was kept at room temperature on an orbital stirrer at 400 rpm. When **1** was consumed (TLC analysis and <sup>1</sup>H-NMR), the reaction mixture was concentrated under *vacuum* and the residue was purified by flash chromatography (Petroleum ether / diethyl ether 90/10 then 70/30) to give **3** as white solid (84-97%). Enantiomeric excess (ee%) was determined by HPLC analysis.

#### Heterogeneous conditions

To a solution of *trans*-β-nitrostyrene **1** (37.5 mg, 0.25 mmol) in solvent (0.5 mL) were added dimethyl malonate **2** (43 μL, 0.375 mmol) and the supported chiral catalyst Si-CPN (12-27 mol%).

The resulting mixture was kept at room temperature on an orbital stirrer at 400 rpm for the appropriate time (see table), then filtered and the supported catalyst was washed with CH<sub>2</sub>Cl<sub>2</sub> (10 mL) and drying under *vacuum*. The filtrate was concentrated, enantiomeric excess ee% and conversion were determined by HPLC analysis on crude product, then the residue was purified by flash chromatography (Petroleum ether/ diethyl ether 90/10 then 70/30) to give **3** as a white solid (89-97%).

**(S)-(+)-Methyl 2-carbomethoxy-4-nitro-3-phenyl-butrate **3**:<sup>1</sup>**

<sup>1</sup>H NMR (400 MHz, CDCl<sub>3</sub>) δ 7.30-7.37 (m, 3H), 7.24-7.26 (m, 2H), 4.95 (dd, *J*<sub>1</sub> = 5.2 Hz et *J*<sub>2</sub> = 13.6 Hz, 1H), 4.90 (dd, *J*<sub>1</sub> = 8.8 Hz et *J*<sub>2</sub> = 13.6 Hz, 1H), 4.27 (td, *J* = 5.2 Hz, *J* = 8.8 Hz, 1H), 3.88 (d, *J* = 8.8 Hz, 1H), 3.78 (s, 3H), 3.59 (s, 3H); <sup>13</sup>C NMR (100 MHz, CDCl<sub>3</sub>) δ 167.7 (Cq), 167.1 (Cq), 136.0 (Cq), 128.9 (CH), 128.3 (CH), 127.7 (CH), 77.3 (CH<sub>2</sub>), 54.7 (CH), 52.9 (CH<sub>3</sub>), 52.7 (CH<sub>3</sub>), 42.8 (CH). FTIR: ν (cm<sup>-1</sup>) 3056, 3034, 3012, 2952, 2926, 2849, 1733, 1602, 1561, 1544, 1428, 1383, 768, 706.

The absolute configuration of (+)-**3** enantiomer was determined to be *S* isomer by comparing with data of literature:

[α]<sub>D</sub><sup>25</sup> = + 5.55 (c 1.02, CHCl<sub>3</sub>); ee% = 90%, HPLC analysis; literature<sup>1</sup>: [α]<sub>D</sub><sup>25</sup> = + 5.90 (c 1.02, CHCl<sub>3</sub>); ee % = 96%, HPLC analysis; Mp = 61-62°C (Lit.<sup>5</sup> 63°C recryst. From methyl alcohol) HR-MS (ESI<sup>+</sup>): *m/z* = 304.0788 calcd. for C<sub>13</sub>H<sub>15</sub>NO<sub>6</sub>Na<sup>+</sup> [M+Na<sup>+</sup>]: 304.0792.

**Preparation of racemic mixture of **3****

To a solution of *trans*-β-nitrostyrene **1** (75 mg, 0.5 mmol) in 2-MeTHF/MeOH 50:50 (1 mL) were added dimethyl malonate **2** (171 μL, 1.5 mmol) and K<sub>2</sub>CO<sub>3</sub> (14 mg, 0.1 mmol). The reaction mixture was kept at room temperature on an orbital stirrer at 400 rpm for 24 h. Water (5 mL) was added and the adduct **3** was extracted with EtOAc (3x 5 mL). The combined organic phases were dried over Na<sub>2</sub>SO<sub>4</sub>, filtered and concentrated. The residue was purified by flash chromatography (petroleum ether / diethyl ether 90/10 then 70/30) to give racemic **3** as white solid (115 mg, 88 %).

**High Performance Liquid Chromatography (HPLC) analysis conditions:** Kromasil 3-CelluCoat RP (150 x 4.6 mm), Acetonitrile: H<sub>2</sub>O, 70:30, 0.5 mL/min, λ = 215 nm.

- Typical chromatogram for a mixture 1:1 of **3** (racemic) and **1**.

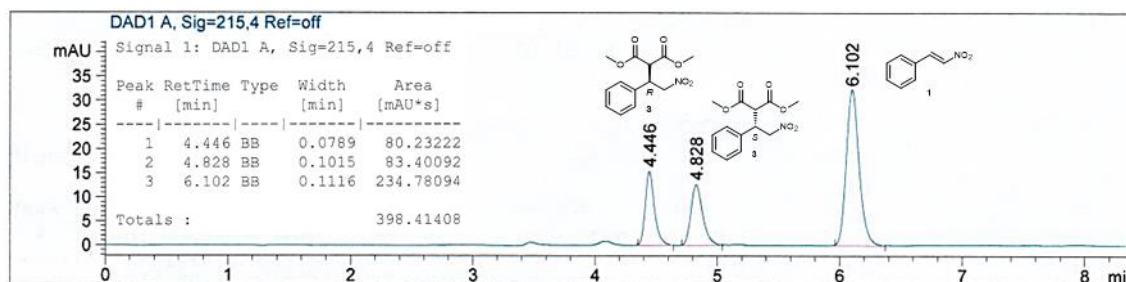

<sup>5</sup> E. P. Kohler and H. Engelbrecht, *J. Am. Chem. Soc.*, 1919, **41**, 764-770.

- Calibration curve for the determination of conversion %

|                                       |       |      |      |      |      |      |      |      |       |
|---------------------------------------|-------|------|------|------|------|------|------|------|-------|
| n mol <b>3</b> / n mol <b>1</b>       | 0.025 | 0.06 | 0.09 | 0.20 | 0.57 | 1.81 | 4.23 | 7.56 | 22.67 |
| racemic <b>3</b> Area / <b>1</b> Area | 0.03  | 0.07 | 0.11 | 0.25 | 0.71 | 2.33 | 5.04 | 9.34 | 27.73 |
| conversion %                          | 3%    | 5%   | 8%   | 17%  | 34%  | 64%  | 81%  | 88%  | 96%   |

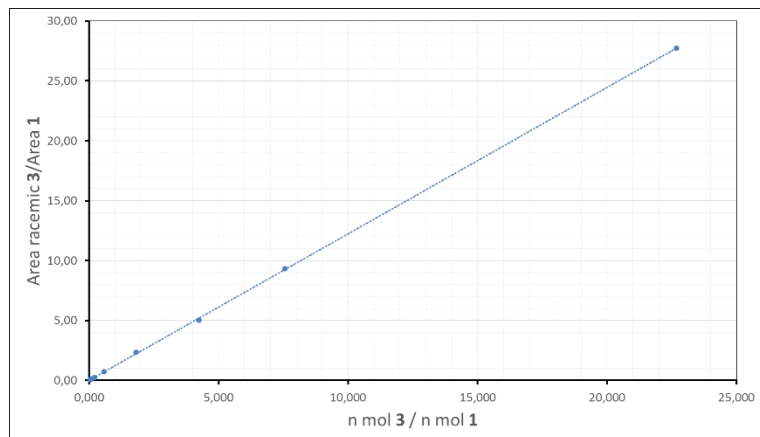

- Determination of enantiomeric excess ee %

| Entry     | Catalyst (mol %) | Solvent | Time (h) | Yield <sup>a</sup> (%) (conv <sup>b</sup> (%)) | ee <sup>c</sup> (%) <b>3</b> |
|-----------|------------------|---------|----------|------------------------------------------------|------------------------------|
| <b>1</b>  | CPN (10)         | THF     | 24       | 88 (100)                                       | 90                           |
| <b>2</b>  | Si-CPN A(12)     | THF     | 62       | 90 (95)                                        | 87                           |
| <b>3</b>  | Si-CPN B (27)    | THF     | 28       | 97 (99)                                        | 73                           |
| <b>4</b>  | Si-CPN C (22)    | THF     | 72       | 95 (99)                                        | 80                           |
| <b>5</b>  | CPN (10)         | 2-MeTHF | 16       | 89 (100)                                       | 92                           |
| <b>6</b>  | Si-CPN A(12)     | 2-MeTHF | 41       | 89 (97)                                        | 87                           |
| <b>7</b>  | Si-CPN B (27)    | 2-MeTHF | 20       | 90 (94)                                        | 77                           |
| <b>8</b>  | Si-CPN C (22)    | 2-MeTHF | 20       | 95 (99)                                        | 88                           |
| <b>9</b>  | CPN (10)         | EtOAc   | 48       | 84 (100)                                       | 89                           |
| <b>10</b> | Si-CPN A(12)     | EtOAc   | 62       | 90 (95)                                        | 82                           |
| <b>11</b> | Si-CPN B (27)    | EtOAc   | 48       | 93 (97)                                        | 76                           |
| <b>12</b> | Si-CPN C (22)    | EtOAc   | 72       | 93 (97)                                        | 83                           |
| <b>13</b> | CPN (10)         | EtOH    | 24       | 97 (100)                                       | 57                           |
| <b>14</b> | Si-CPN A(12)     | EtOH    | 30       | 93 (96)                                        | 60                           |
| <b>15</b> | Si-CPN B (27)    | EtOH    | 21       | 93 (96)                                        | 42                           |
| <b>16</b> | Si-CPN C (22)    | EtOH    | 48       | 92 (98)                                        | 54                           |

<sup>a</sup> Isolated yield. <sup>b</sup> Conv (%) determined on crude reaction mixture by HPLC with Si-CPN or RMN-<sup>1</sup>H with CPN. <sup>c</sup> Determined by HPLC analysis on a Kromasil 3-CelluCoat RP column.



## Entry

**HPLC conditions: Kromasil 3-CelluCoat RP (150 x 4.6 mm), Acetonitrile:  
H<sub>2</sub>O, 70:30, 0.5 mL/min,  $\lambda$  = 215 nm.**

**1**  
CPN  
THF, ee% = 90

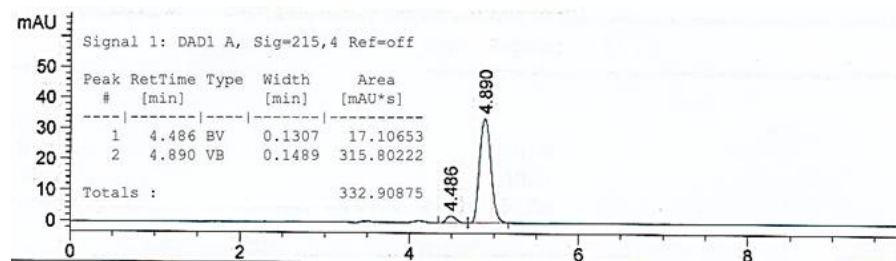

**2**  
Si-CPN A  
THF, ee% = 87

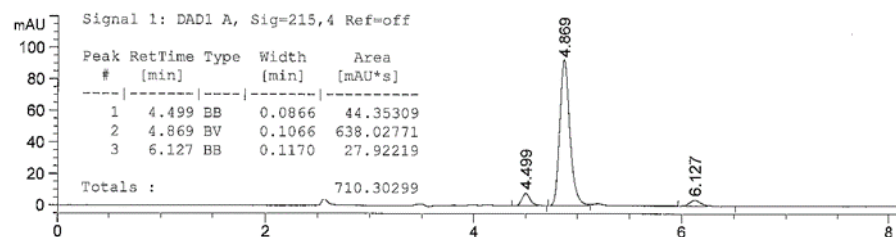

**3**  
Si-CPN B  
THF, ee% = 73

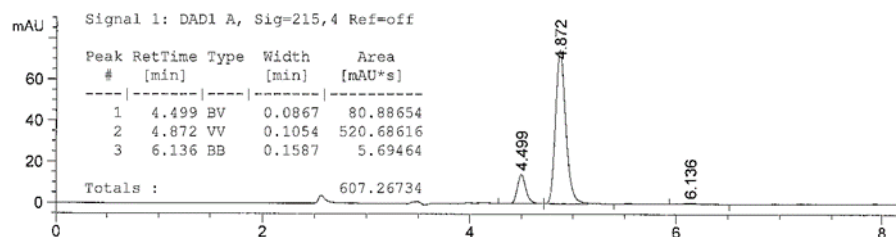

**4**  
Si-CPN C  
THF, ee% = 80

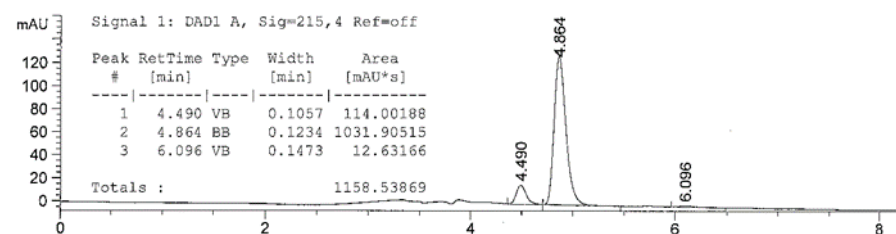

**5**  
CPN  
2-MeTHF, ee% = 92

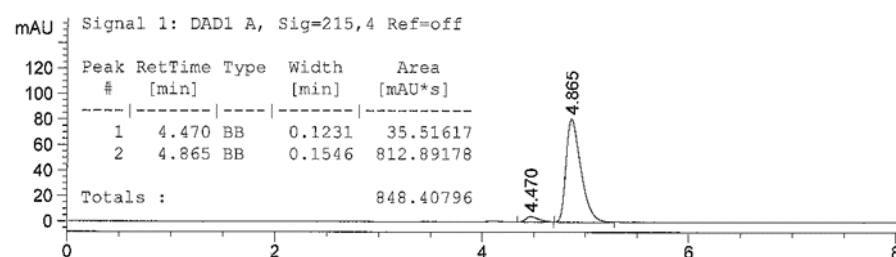

**6**  
Si-CPN A  
2-MeTHF, ee% = 87

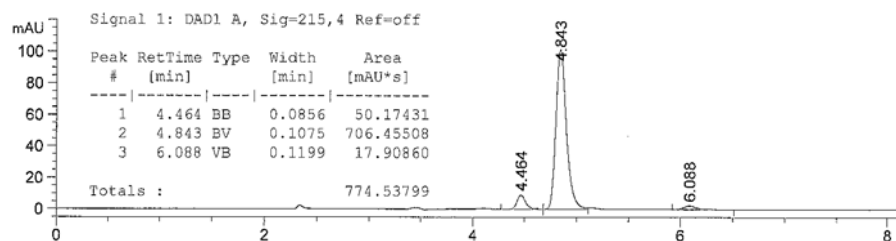

7  
Si-CPN B  
2-MeTHF, ee% = 77

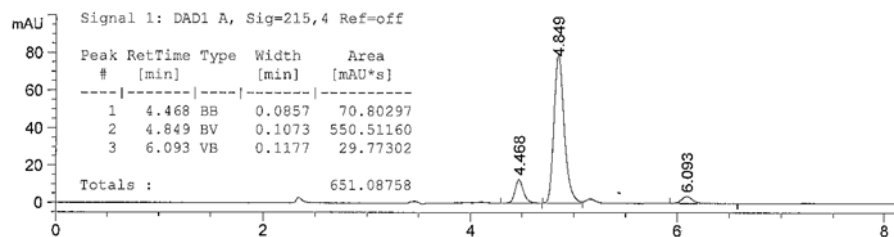

8  
Si-CPN C  
2-MeTHF, ee% = 88

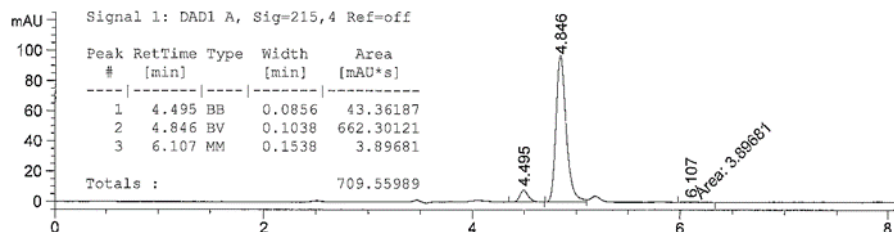

9  
CPN  
EtOAc, ee% = 89

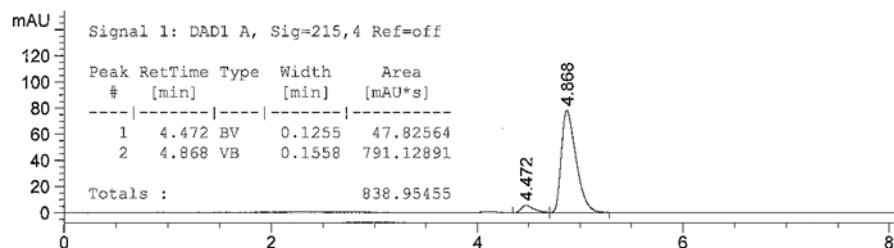

10  
Si-CPN A  
EtOAc, ee% = 82

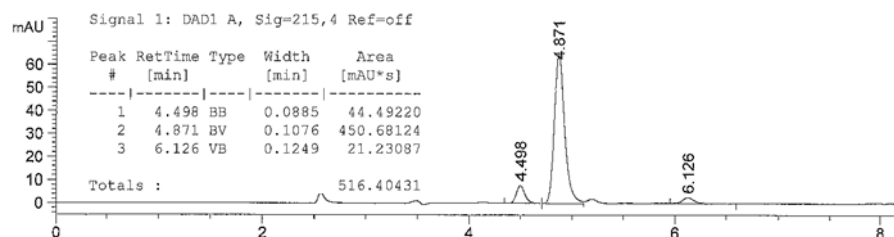

11  
Si-CPN B  
EtOAc, ee% = 76

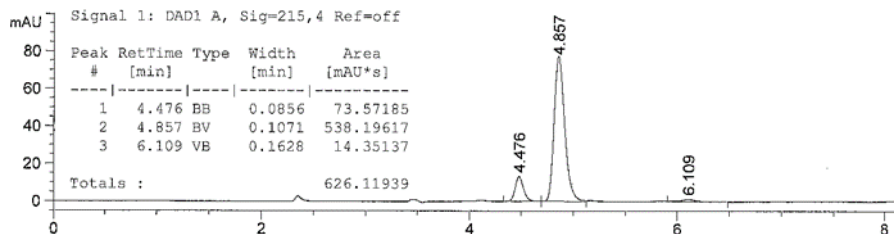

12  
Si-CPN C  
EtOAc, ee% = 83

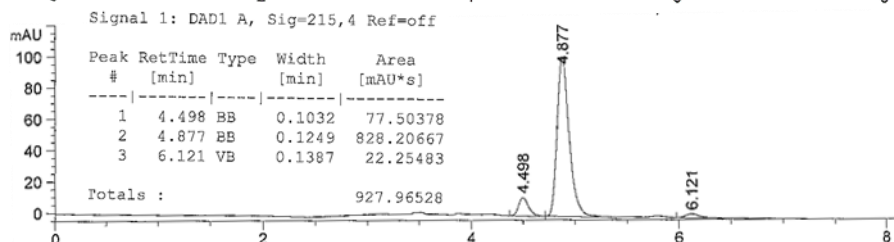

13  
CPN  
EtOH, ee% = 57

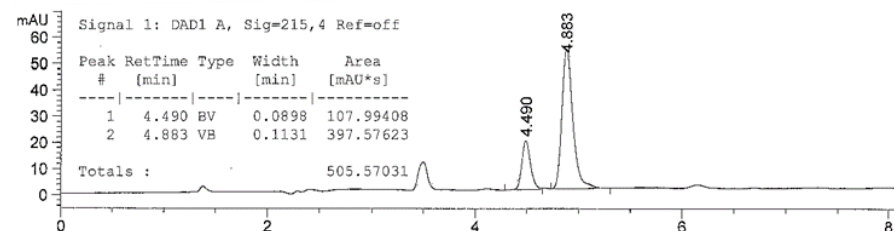

**14**  
Si-CPN A  
EtOH, ee% = 60

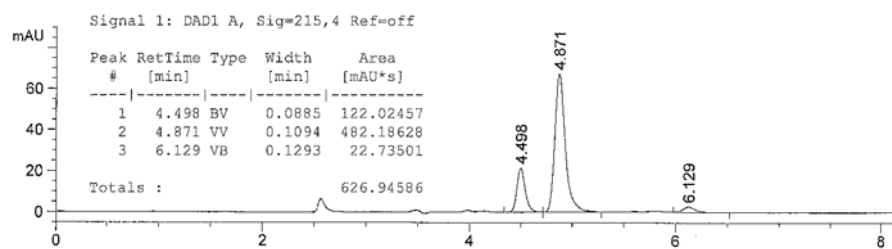

**15**  
Si-CPN B  
EtOH, ee% = 42

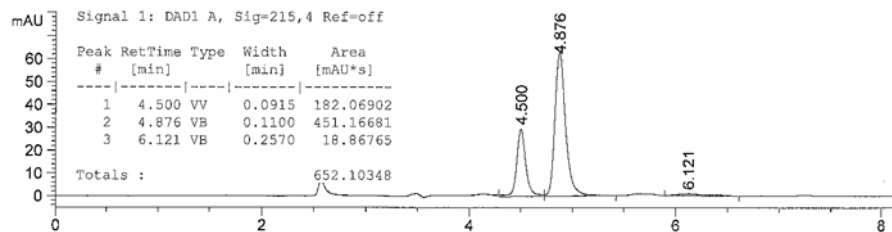

**16**  
Si-CPN C  
EtOH, ee% = 54

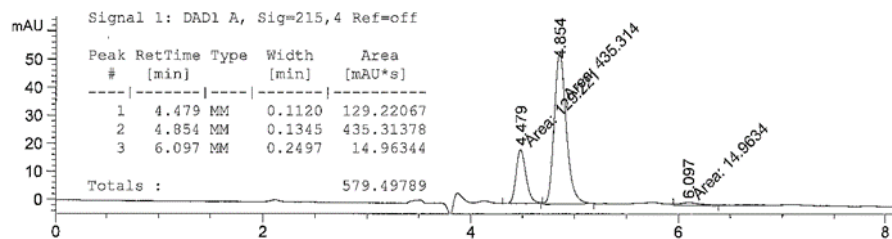

Supplement: c5ra02292d1.pdf [file c5ra02292d1.pdf]
